# Supplementary material
Source: PubMed Central journal article supplement (PMC3125441)
Supplement: NIHMS294727-supplement-1.pdf [file NIHMS294727-supplement-1.pdf]

## SUPPLEMENTAL MATERIAL

**Online Supplement Table 1: ROC Analysis at the Operating Point for Pooled Voxel-Based Thresholded CTP Parameter Map Assessment of Infarct Core**

| Software     | Parameter        | All  |      |      |      | Gray matter |      |      |      | White matter |      |      |      | Basal ganglia |      |      |      |
|--------------|------------------|------|------|------|------|-------------|------|------|------|--------------|------|------|------|---------------|------|------|------|
|              |                  | AUC  | T    | SN   | SP   | AUC         | T    | SN   | SP   | AUC          | T    | SN   | SP   | AUC           | T    | SN   | SP   |
| <b>A-std</b> | <b>CBV</b>       | 0.81 | 0.9  | 0.68 | 0.83 | 0.83        | 1.1  | 0.72 | 0.84 | 0.78         | 0.8  | 0.66 | 0.80 | 0.80          | 1.2  | 0.70 | 0.84 |
|              | <b>rCBV</b>      | 0.83 | 51%  | 0.68 | 0.85 | 0.84        | 64%  | 0.73 | 0.85 | 0.80         | 43%  | 0.63 | 0.85 | 0.81          | 60%  | 0.67 | 0.91 |
|              | <b>CBF</b>       | 0.88 | 4.7  | 0.80 | 0.81 | 0.90        | 4.9  | 0.83 | 0.84 | 0.85         | 4.1  | 0.78 | 0.78 | 0.83          | 7.1  | 0.68 | 0.88 |
|              | <b>rCBF</b>      | 0.88 | 16%  | 0.80 | 0.83 | 0.90        | 18%  | 0.83 | 0.85 | 0.86         | 14%  | 0.78 | 0.80 | 0.84          | 33%  | 0.70 | 0.89 |
|              | <b>MTT</b>       | 0.82 | 15   | 0.73 | 0.77 | 0.85        | 17.3 | 0.76 | 0.80 | 0.80         | 15   | 0.70 | 0.75 | 0.78          | 9.3  | 0.59 | 0.85 |
|              | <b>rMTT</b>      | 0.82 | 272% | 0.76 | 0.74 | 0.85        | 348% | 0.75 | 0.82 | 0.80         | 265% | 0.74 | 0.71 | 0.79          | 165% | 0.62 | 0.83 |
|              | <b>CBV*CBF</b>   | 0.87 | 4.8  | 0.78 | 0.82 | 0.89        | 5.7  | 0.80 | 0.85 | 0.85         | 4.0  | 0.77 | 0.78 | 0.82          | 7.2  | 0.68 | 0.89 |
|              | <b>rCBV*rCBF</b> | 0.88 | 7%   | 0.78 | 0.84 | 0.89        | 10%  | 0.82 | 0.85 | 0.85         | 5%   | 0.76 | 0.82 | 0.83          | 13%  | 0.68 | 0.92 |
| <b>A-dc</b>  | <b>CBV</b>       | 0.76 | 1.1  | 0.62 | 0.78 | 0.79        | 1.3  | 0.66 | 0.80 | 0.71         | 1.0  | 0.61 | 0.72 | 0.72          | 1.2  | 0.57 | 0.82 |
|              | <b>rCBV</b>      | 0.77 | 60%  | 0.62 | 0.79 | 0.79        | 76%  | 0.69 | 0.79 | 0.71         | 52%  | 0.58 | 0.74 | 0.75          | 64%  | 0.59 | 0.82 |
|              | <b>CBF</b>       | 0.85 | 5.4  | 0.75 | 0.82 | 0.87        | 6.1  | 0.77 | 0.84 | 0.83         | 4.4  | 0.71 | 0.81 | 0.79          | 5.7  | 0.59 | 0.88 |
|              | <b>rCBF</b>      | 0.85 | 28%  | 0.74 | 0.84 | 0.88        | 32%  | 0.75 | 0.86 | 0.83         | 24%  | 0.72 | 0.81 | 0.80          | 46%  | 0.69 | 0.82 |
|              | <b>MTT</b>       | 0.74 | 18.7 | 0.59 | 0.80 | 0.76        | 19.8 | 0.60 | 0.83 | 0.73         | 17.0 | 0.63 | 0.75 | 0.71          | 12.9 | 0.58 | 0.75 |
|              | <b>rMTT</b>      | 0.75 | 207% | 0.62 | 0.80 | 0.76        | 217% | 0.62 | 0.82 | 0.74         | 207% | 0.61 | 0.77 | 0.70          | 158% | 0.51 | 0.82 |
|              | <b>CBV*CBF</b>   | 0.83 | 6.8  | 0.73 | 0.81 | 0.86        | 9.2  | 0.75 | 0.83 | 0.80         | 4.6  | 0.68 | 0.80 | 0.77          | 8.4  | 0.62 | 0.85 |
|              | <b>rCBV*rCBF</b> | 0.85 | 14%  | 0.72 | 0.83 | 0.87        | 21%  | 0.76 | 0.85 | 0.82         | 10%  | 0.70 | 0.81 | 0.79          | 18%  | 0.63 | 0.88 |
| <b>B-std</b> | <b>CBV</b>       | 0.74 | 1.3  | 0.71 | 0.72 | 0.74        | 1.5  | 0.74 | 0.71 | 0.74         | 1.1  | 0.66 | 0.74 | 0.81          | 1.5  | 0.72 | 0.84 |
|              | <b>rCBV</b>      | 0.75 | 51%  | 0.71 | 0.73 | 0.74        | 59%  | 0.74 | 0.72 | 0.74         | 43%  | 0.67 | 0.74 | 0.79          | 62%  | 0.69 | 0.83 |
|              | <b>CBF</b>       | 0.77 | 10.0 | 0.76 | 0.73 | 0.77        | 11.8 | 0.81 | 0.70 | 0.76         | 8.7  | 0.71 | 0.75 | 0.83          | 13.6 | 0.72 | 0.86 |
|              | <b>rCBF</b>      | 0.78 | 32%  | 0.77 | 0.73 | 0.78        | 36%  | 0.82 | 0.71 | 0.77         | 27%  | 0.73 | 0.75 | 0.81          | 45%  | 0.70 | 0.87 |
|              | <b>MTT</b>       | 0.67 | 10.0 | 0.70 | 0.67 | 0.69        | 10.0 | 0.77 | 0.64 | 0.65         | 10.0 | 0.66 | 0.68 | 0.72          | 9.3  | 0.53 | 0.88 |
|              | <b>rMTT</b>      | 0.65 | 147% | 0.72 | 0.60 | 0.66        | 138% | 0.83 | 0.52 | 0.65         | 147% | 0.69 | 0.61 | 0.70          | 124% | 0.56 | 0.79 |
|              | <b>CBV*CBF</b>   | 0.77 | 15.9 | 0.75 | 0.72 | 0.77        | 22.2 | 0.79 | 0.69 | 0.76         | 12.1 | 0.71 | 0.74 | 0.83          | 21.4 | 0.73 | 0.86 |
|              | <b>rCBV*rCBF</b> | 0.78 | 14%  | 0.76 | 0.72 | 0.78        | 19%  | 0.80 | 0.71 | 0.77         | 10%  | 0.72 | 0.74 | 0.81          | 24%  | 0.72 | 0.84 |

AUC: Area Under the ROC Curve; T: Threshold; SN: Sensitivity; SP: Specificity; r: relative.
